# Supplementary material for: Investigation into the adsorption of partially hydrolyzed polyacrylamide onto in situ formed magnesium hydroxide particles
Source: Royal Society of Chemistry journal article supplement (doi:10.1039/c6ra02308h), 2016-01-01
Supplement: c6ra02308h1.pdf [file c6ra02308h1.pdf]

**Supporting Information:**

**Investigation on the adsorption of partially hydrolyzed polyacrylamide onto in-situ formed magnesium hydroxide particles**

Feng Li <sup>a</sup>, Lanlan Ye <sup>a</sup>, Yujiang Li <sup>a,\*</sup>, Tao Wu <sup>b,\*</sup>

*<sup>a</sup> Shandong Provincial Key Laboratory of Water Pollution Control and Resource Reuse, School of Environmental Science & Engineering, Shandong University, Jinan, 250100, PR China*

*<sup>b</sup> Key Laboratory of Colloid & Interface Science of Education Ministry, Shandong University, Jinan, 250100, PR China*

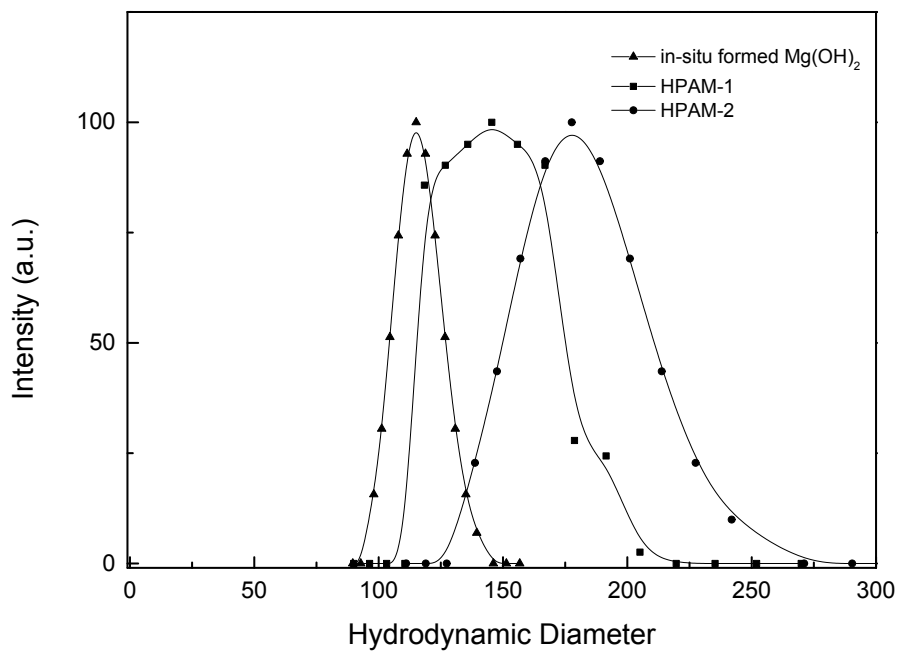

**Figure S1.** Hydrodynamic diameter distribution of Mg(OH)<sub>2</sub> and HPAM.

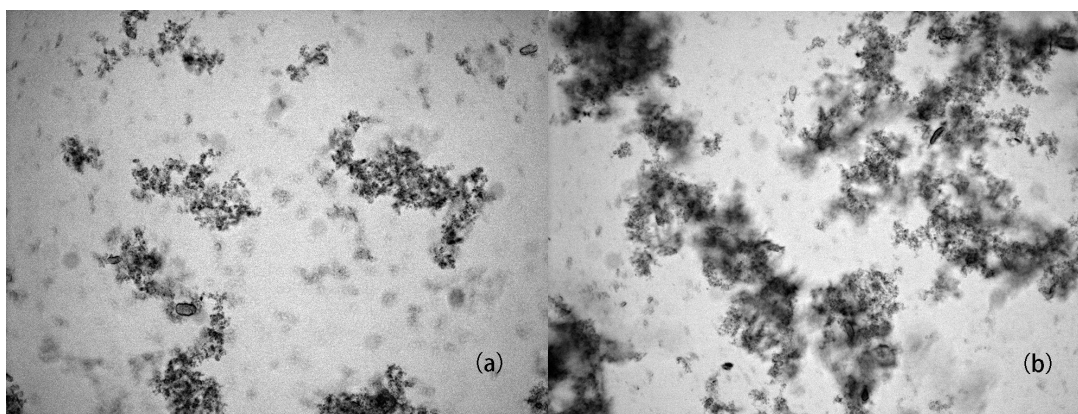

**Fig. S2.** Optical microscope images of Mg(OH)<sub>2</sub>-HPAM complexes. (a) Mg(OH)<sub>2</sub>-HPAM-1 and (b) Mg(OH)<sub>2</sub>-HPAM-2 immediately after adsorption (the Mg(OH)<sub>2</sub> concentration in all of the aqueous dispersions was 0.3 M, and the HPAM concentration was 100 mg/L).
